# Supplementary material for: Sustained Extracellular Electrical Stimulation Modulates the Permeability of Gap Junctions in rd1 Mouse Retina with Photoreceptor Degeneration
Source: MDPI journal article supplement (doi:10.3390/ijms25031616), 2024-01-28
Supplement: s1 [file s1]

# Sustained Extracellular Electrical Stimulation Modulates the Permeability of Gap Junctions in *rd1* Mouse Retina with Photoreceptor Degeneration

Sophie Stürmer, Sylvia Bolz, Eberhart Zrenner, Marius Ueffing and Wadood Haq \*

Institute for Ophthalmic Research, University of Tuebingen, 72076 Tuebingen, Germany; sophie.stuermer@uni-tuebingen.de (S.S.); sylvia.bolz@uni-tuebingen.de (S.B.); ez@uni-tuebingen.de (E.Z.); marius.ueffing@uni-tuebingen.de (M.U.)

\* Correspondence: wadood.haq@uni-tuebingen.de (W.H.)

**Table S1.** P-values of statistical data presented in Figure 4. Statistical evaluation of tracer diffusion rate (TDR, Figure 4A) at 150  $\mu$ m mark for (Figure 4B1) HC-HC net and (Figure 4B2) GC-GC net assessed under different treatment conditions. One-way ANOVA was applied to estimate the statistical significance, followed by a Dunnett's test for multiple comparisons. Significance levels: not significant (n.s.), \*:  $p < 0.05$ , \*\*:  $p < 0.01$  and \*\*\*:  $p < 0.001$ .

| A) Statistical analysis of tracer diffusion rates in the outer retina        |                   |                   |                   |                   |                   |                   |
|------------------------------------------------------------------------------|-------------------|-------------------|-------------------|-------------------|-------------------|-------------------|
|                                                                              | Control           | 0.5 V, 1 h        | 1 V, 0.5 h        | 1 V, 1 h          | 1 V, 2 h          | CBX               |
| Control                                                                      |                   | 0.74<br>(n.s.)    | 1.00<br>(n.s.)    | 5.26E-11<br>(***) | 1.15E-08<br>(***) | 3.41E-12<br>(***) |
| 0.5 V, 1 h                                                                   | 0.74<br>(n.s.)    |                   | 0.98<br>(n.s.)    | 3.52E-08<br>(***) | 4.68E-06<br>(***) | 1.05E-09<br>(***) |
| 1 V, 0.5 h                                                                   | 1.00<br>(n.s.)    | 0.98<br>(n.s.)    |                   | 4.62E-09<br>(***) | 4.13E-07<br>(***) | 1.89E-10<br>(***) |
| 1 V, 1 h                                                                     | 5.26E-11<br>(***) | 3.52E-08<br>(***) | 4.62E-09<br>(***) |                   | 1.00<br>(n.s.)    | 0.68<br>(n.s.)    |
| 1 V, 2 h                                                                     | 1.15E-08<br>(***) | 4.68E-06<br>(***) | 4.13E-07<br>(***) | 1.00<br>(n.s.)    |                   | 0.20<br>(n.s.)    |
| CBX                                                                          | 3.41E-12<br>(***) | 1.05E-09<br>(***) | 1.89E-10<br>(***) | 0.68<br>(n.s.)    | 0.20<br>(n.s.)    |                   |
| B) Statistical analysis of tracer diffusion rates in the ganglion cell layer |                   |                   |                   |                   |                   |                   |
|                                                                              | Control           | 0.5 V, 1 h        | 1 V, 0.5 h        | 1 V, 1 h          | 1 V, 2 h          | CBX               |
| Control                                                                      |                   | 0.94<br>(n.s.)    | 0.32<br>(n.s.)    | 8.75E-07<br>(***) | 9.14E-06<br>(***) | 3.60E-07<br>(***) |
| 0.5 V, 1 h                                                                   | 0.94<br>(n.s.)    |                   | 1.00<br>(n.s.)    | 9.06E-05<br>(***) | 5.26E-04<br>(***) | 2.52E-05<br>(***) |
| 1 V, 0.5 h                                                                   | 0.32<br>(n.s.)    | 1.00<br>(n.s.)    |                   | 9.72E-03<br>(**)  | 2.40E-02<br>(*)   | 2.11E-03<br>(**)  |
| 1 V, 1 h                                                                     | 8.75E-07<br>(***) | 9.06E-05<br>(***) | 9.72E-03<br>(**)  |                   | 1.00<br>(n.s.)    | 1.00<br>(n.s.)    |
| 1 V, 2 h                                                                     | 9.14E-06<br>(***) | 5.26E-04<br>(***) | 2.40E-02<br>(*)   | 1.00<br>(n.s.)    |                   | 1.00<br>(n.s.)    |
| CBX                                                                          | 3.60E-07<br>(***) | 2.52E-05<br>(***) | 2.11E-03<br>(**)  | 1.00<br>(n.s.)    | 1.00<br>(n.s.)    |                   |
